# Supplementary material for: In situ laser-assisted decoration of Au nanoparticles on 3D porous graphene for enhanced 2-CEES sensing
Source: Royal Society of Chemistry journal article supplement (doi:10.1039/d4tc00707g), 2024-01-01
Supplement: d4tc00707g1.pdf [file d4tc00707g1.pdf]

**Electronic Supplementary Information for**

**In situ laser-assisted decoration of Au nanoparticles on 3D porous graphene for enhanced 2-  
CEES sensing**

Ling Zhang, Jie Yang, Junchao Yang, Jianan Wei, Chuan Zhou, Jiang Zhao\* and Qibin  
Huang\*

*State Key Laboratory of NBC Protection for Civilian, Beijing 102205, China*

\*Corresponding author. Email: huangqibin@sklnbcpc.cn (Q. H.) and  
13021911723@163.com (J. Z.)

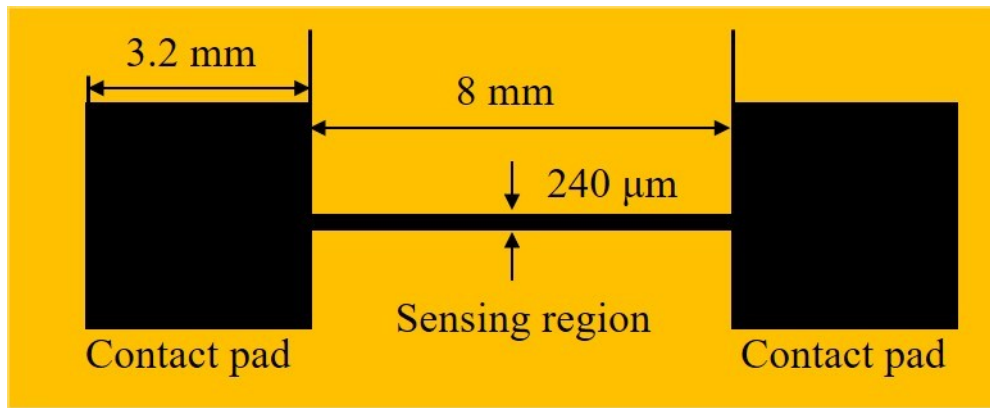

**Fig. S1.** Design and geometric parameters of the LIG-based gas sensor.

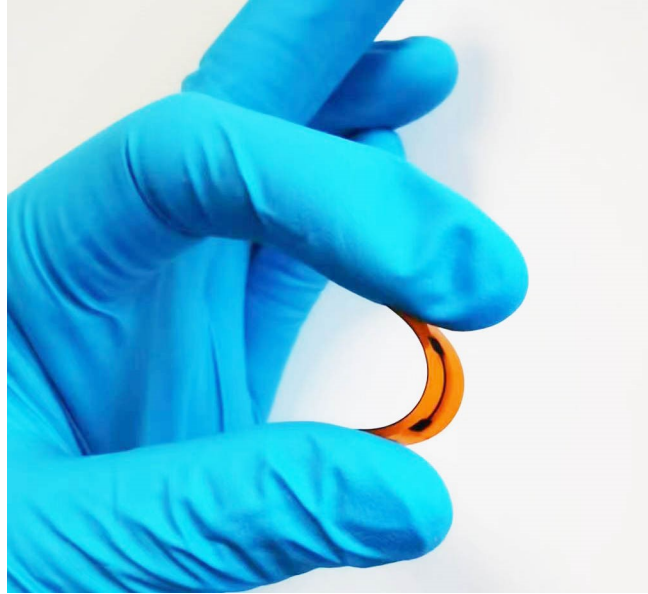

**Fig. S2.** Optical image of the flexible LIG/Au gas sensor.

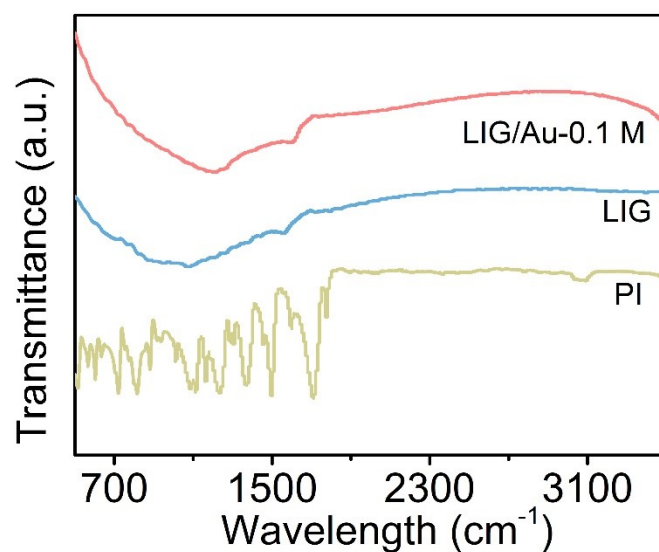

**Fig. S3.** FTIR spectra of PI, LIG and LIG/Au-0.1 M. FTIR spectrum of PI demonstrates that obvious peaks appear at 1090~1776  $\text{cm}^{-1}$ , which are attributed to the stretching and bending modes of the C-O, C-N, and C=C bonds.<sup>1</sup> While broad absorption from 1000  $\text{cm}^{-1}$  to 1700  $\text{cm}^{-1}$  are both presented for LIG and LIG/Au-0.1 M, demonstrating that the laser scribing resulted in a large change in the local environment.

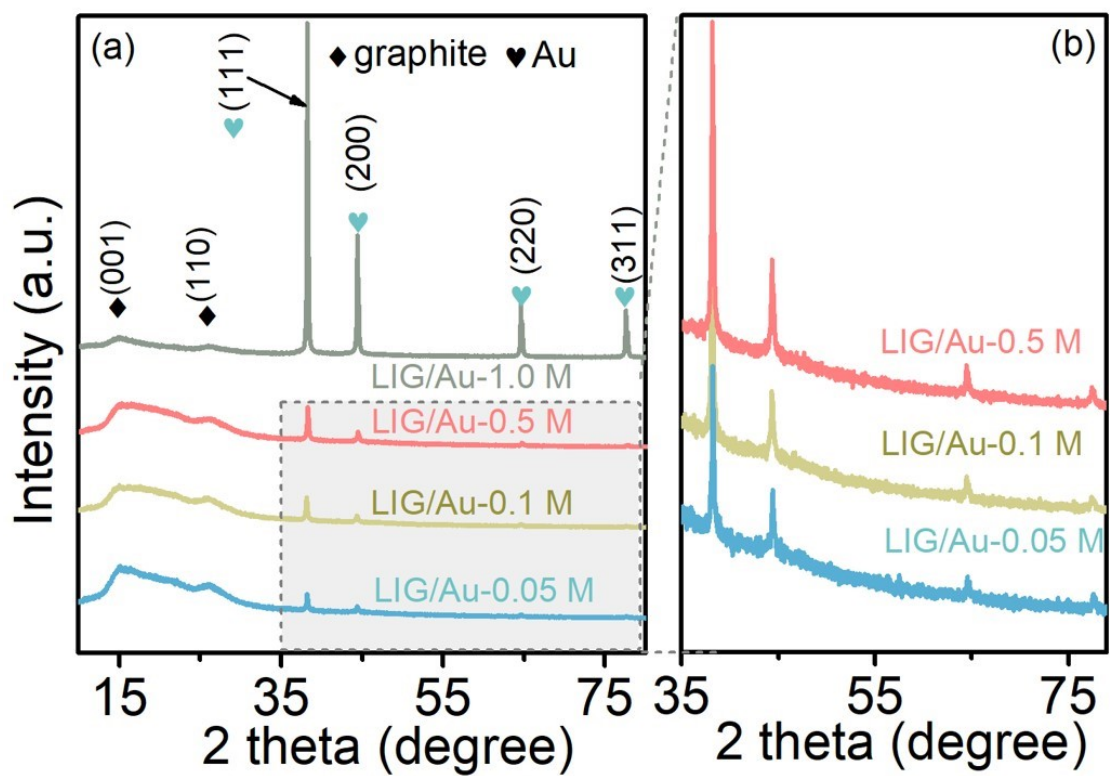

**Fig. S4.** (a) The XRD patterns of LIG/Au-based hybrids with various HAuCl<sub>4</sub> concentrations, and (b) Partial magnification of the XRD patterns of LIG/Au-0.05 M, LIG/Au-0.1 M and LIG/Au-0.5 M.

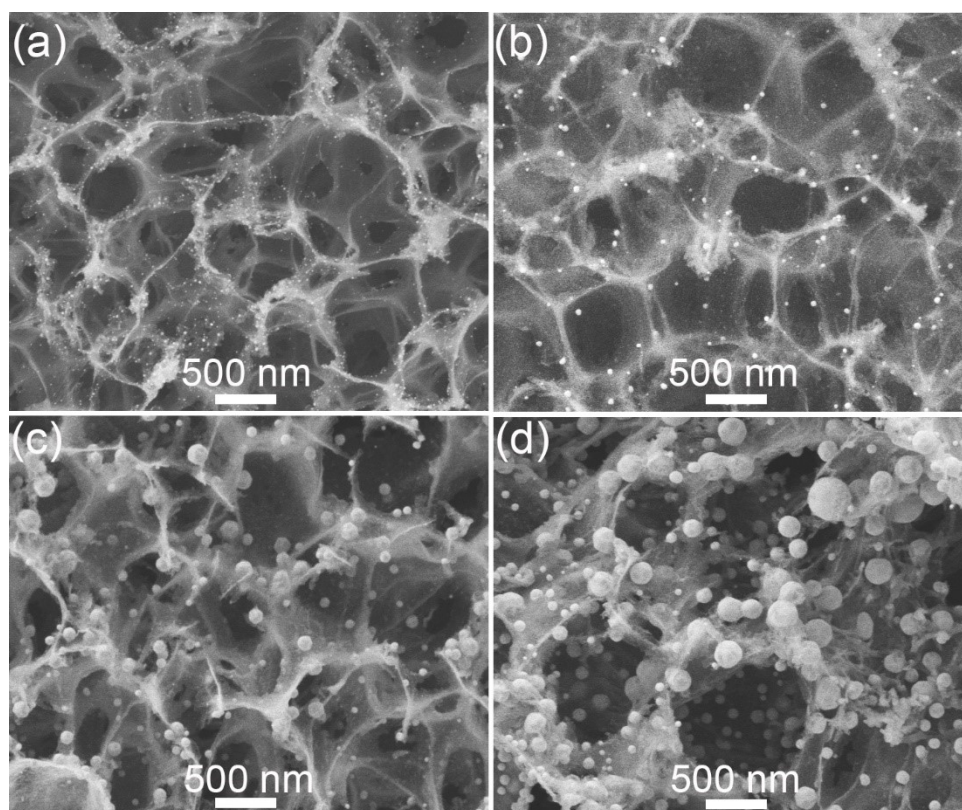

**Fig. S5.** (a~d) SEM images for LIG/Au-based hybrids as  $\text{HAuCl}_4$  concentration varying from 0.05 to 1.0 M.

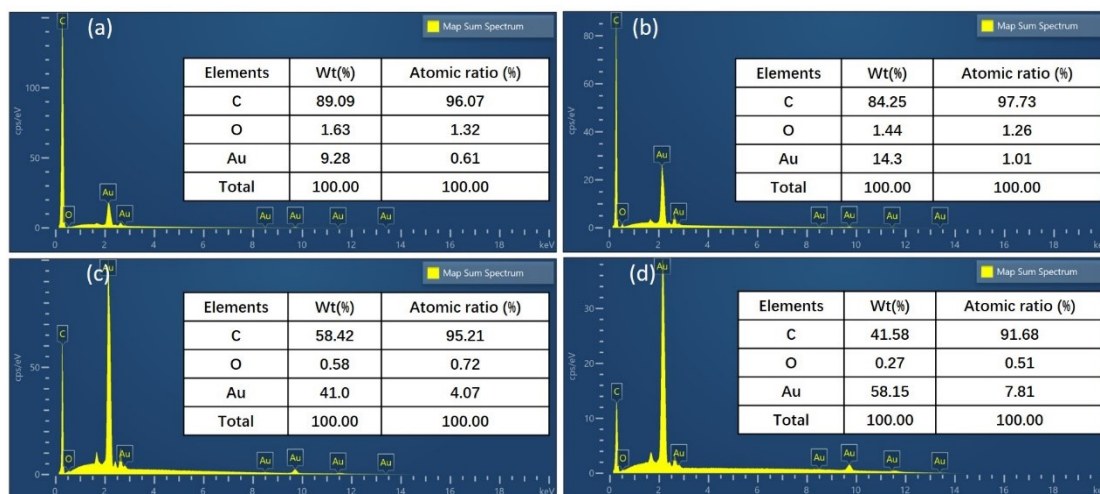

**Fig. S6.** (a~d) The EDX spectra of LIG/Au-0.05 M, IG/Au-0.1 M, IG/Au-0.5 M, IG/Au-1.0 M. As observed, the atomic percentage of Au increases with the increase of concentration of  $\text{HAuCl}_4$ .

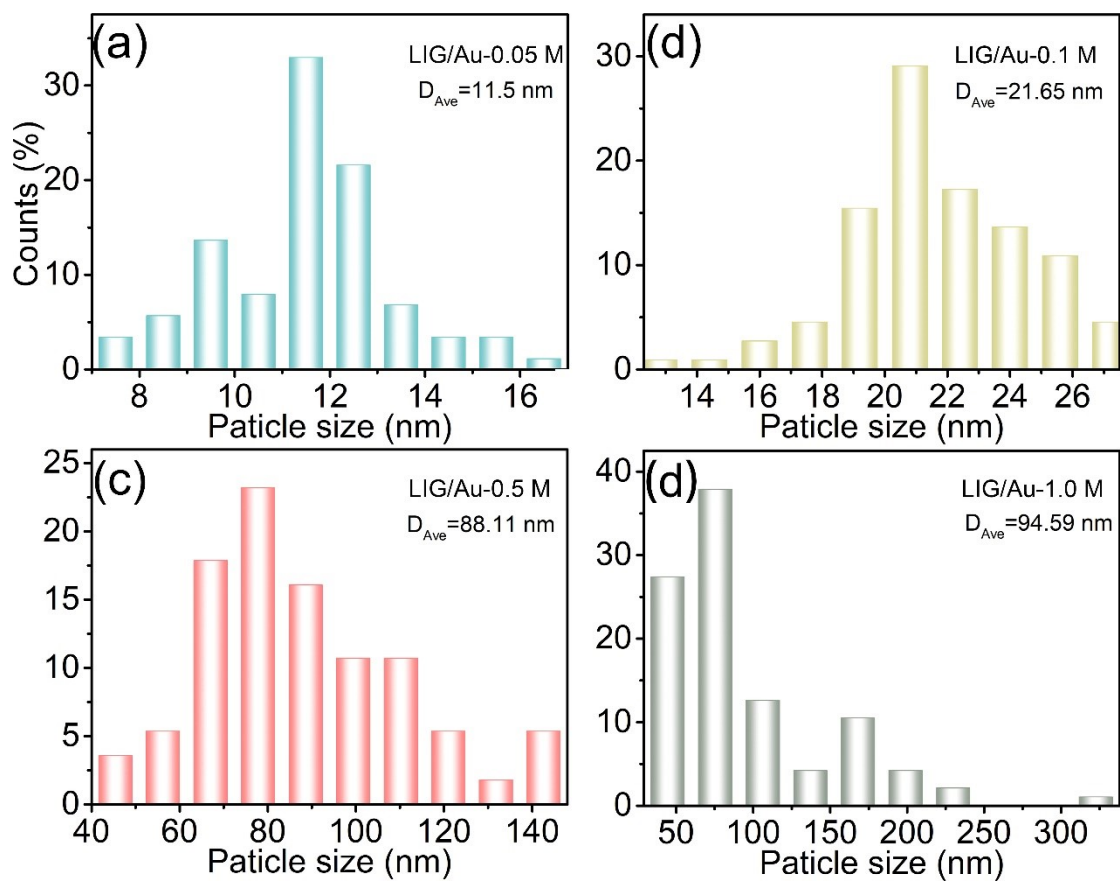

**Fig. S7.** Statistical distribution of particle size of Au nanoparticles in LIG/Au-0.05 M, LIG/Au-0.1 M, LIG/Au-0.5 M and LIG/Au-1.0 M.



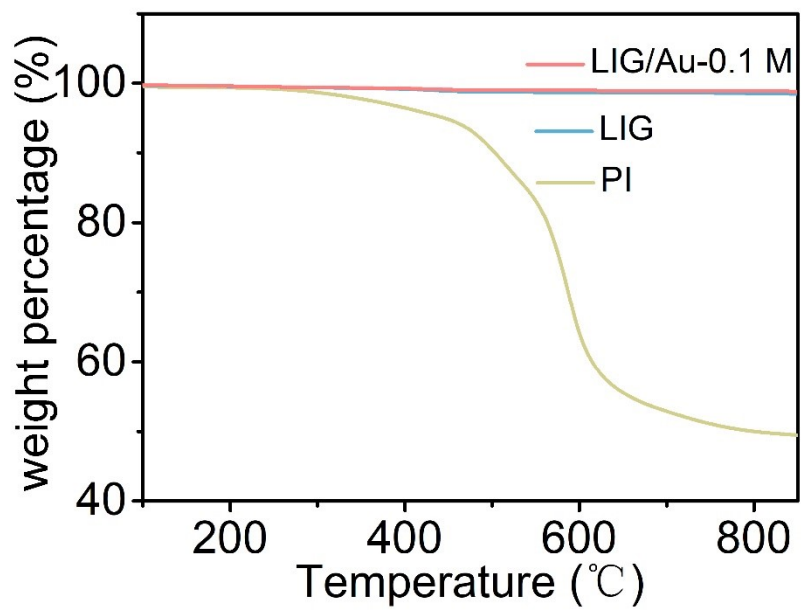

**Fig. S8.** Plots of TGA for PI, LIG and LIG/Au-0.1 M.

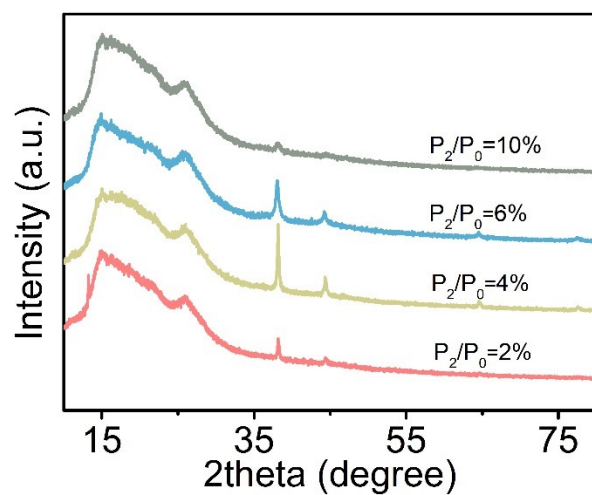

**Fig. S9.** The XRD patterns of LIG/Au-0.1 M hybrids fabricated under various secondary laser power ( $P_2/P_0=2\%$ , 4%, 6%, 10%).

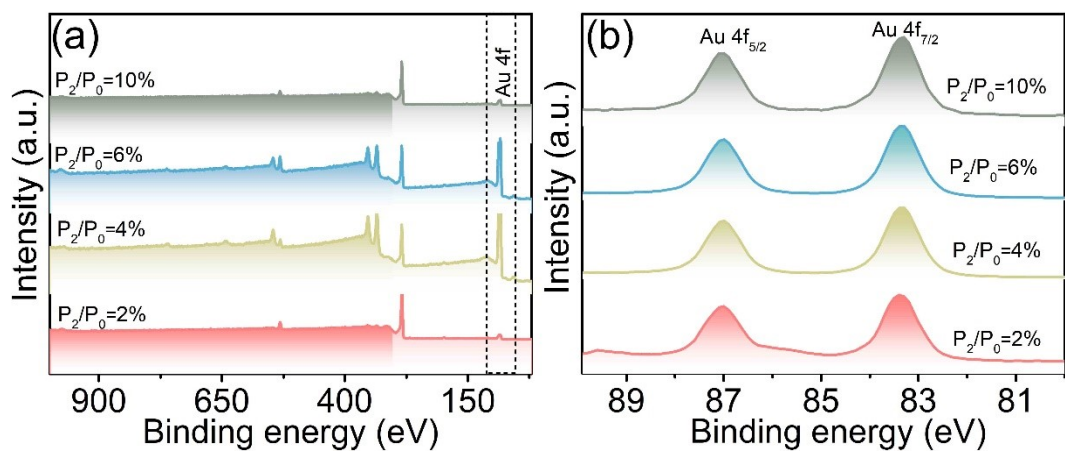

**Fig. S10.** (a) The wide XPS survey scans and (b) high-resolution XPS spectra of Au 4f in LIG/Au-0.1 M with different secondary laser powers ( $P_2/P_0=2\%$ , 4%, 6%, 10%).

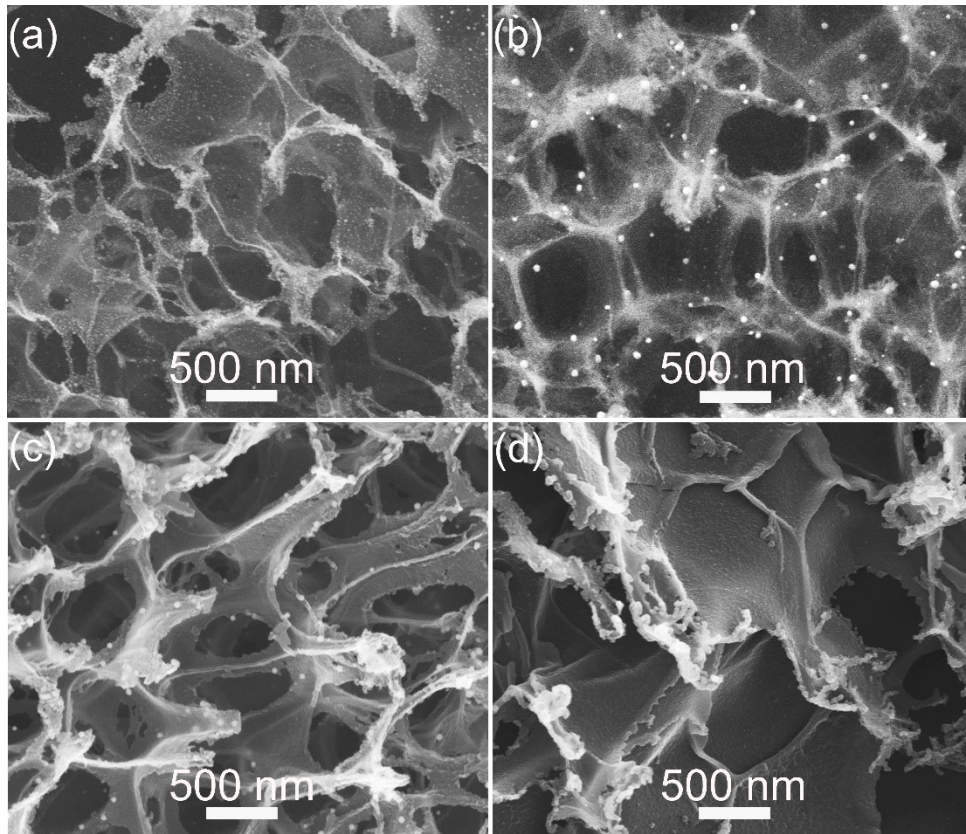

**Fig. S11.** (a~d) The SEM images of LIG/Au-0.1 M with different secondary laser powers ( $P_2/P_0=2\%$ , 4%, 6%, 10%).

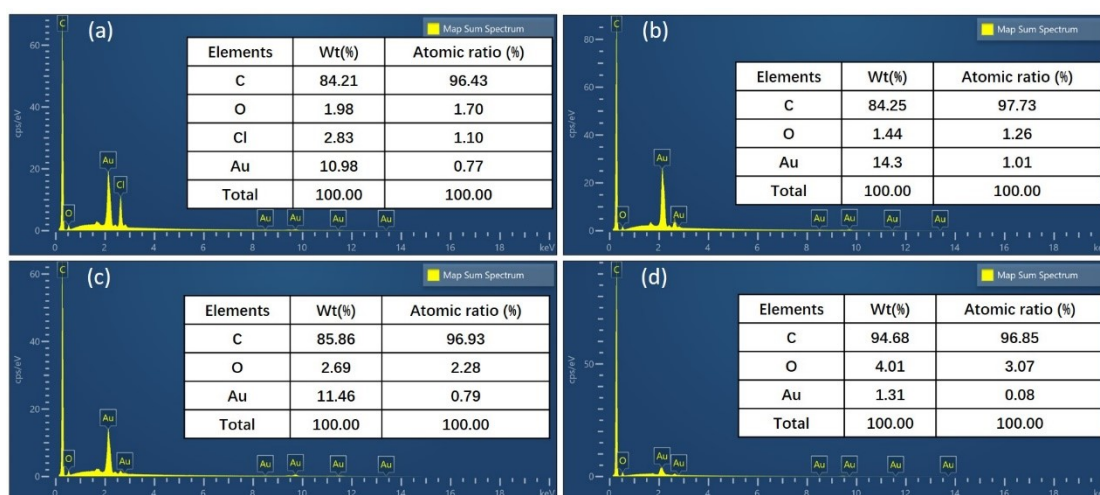

**Fig. S12.** (a~d) The EDX spectra of LiG/Au-0.1 M with different secondary laser power ( $P_2/P_0=2\%$ , 4%, 6%, 10%). As the power increases, the atomic percentage (at%) of Au initially remains almost unchanged and then decreases. (a) The high content of Cl elemental (1.1 at%) suggests a large amount of  $\text{HAuCl}_4$  had not undergone decomposition under  $2\%P_0$ . (b) Disappearance of elemental Cl and high Au content element (1.01 at%) with  $P_2/P_0=4\%$  suggest the complete decomposition of  $\text{HAuCl}_4$  to Au nanoparticles. (c,d) The continuous increase  $P_2/P_0$  to 6% and 10% successively shrunk the Au content to 0.79 at% and 0.08 at%, respectively.

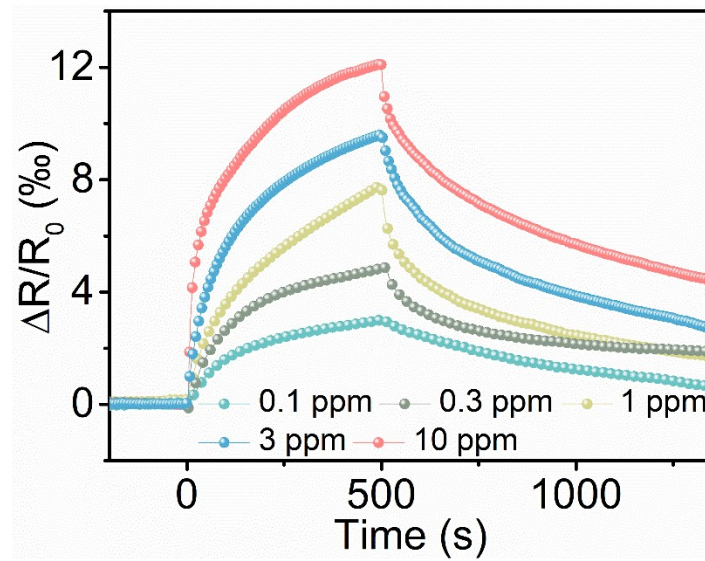

**Fig. S13.** Dynamic response variation upon exposure to 2-CEES with various concentrations ranging from 0.1 to 10 ppm.

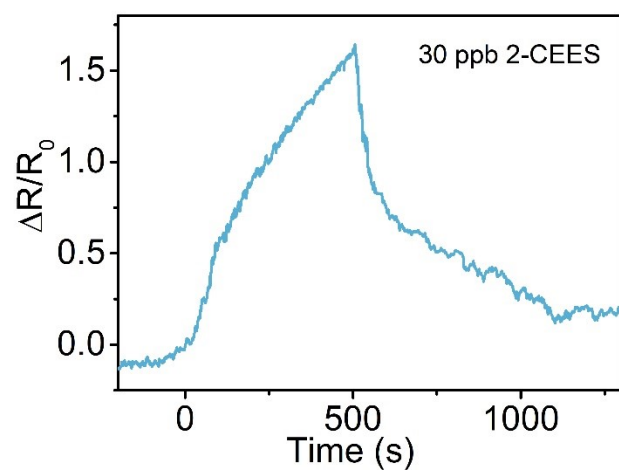

**Fig. S14.** Experimental demonstration of the LIG/Au-0.1 M to detect 30 ppb 2-CEES.

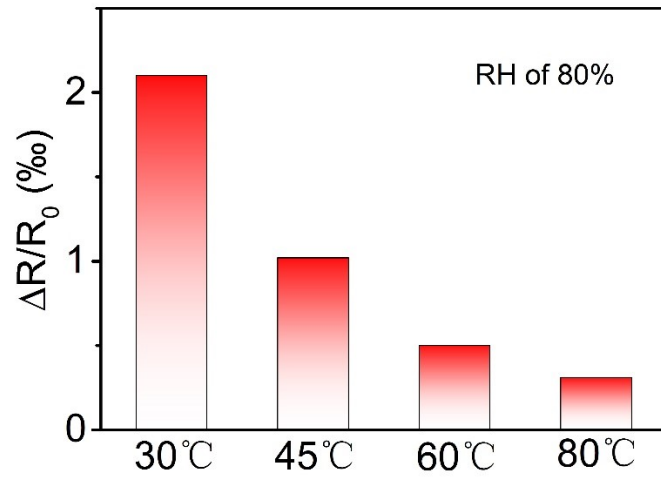

**Fig. S15.** Effect of the high RH of 88 % on the response of the LIG/Au-0.1 M gas sensor at temperature ranging from 30 °C to 80 °C.



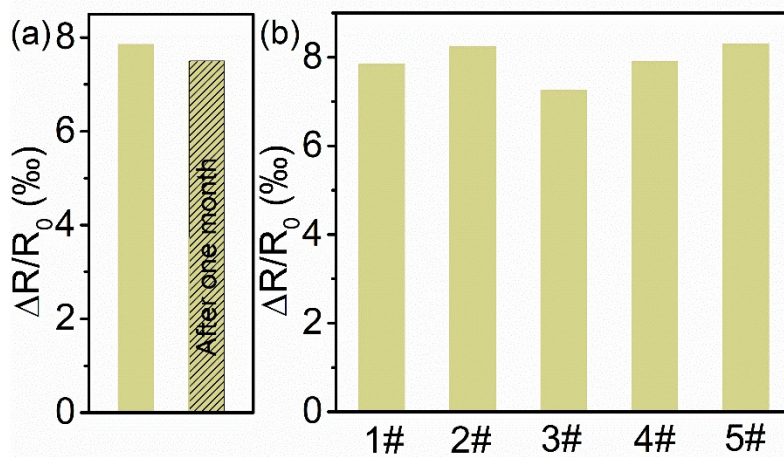

**Fig. S16.** (a) The responses of LIG/Au-0.1 M before and after one month. (b) The responses of five LIG/Au-0.1 M prepared under the same condition. The target gas was 1.0 ppm 2-CEES and the temperature was set as 80 °C.

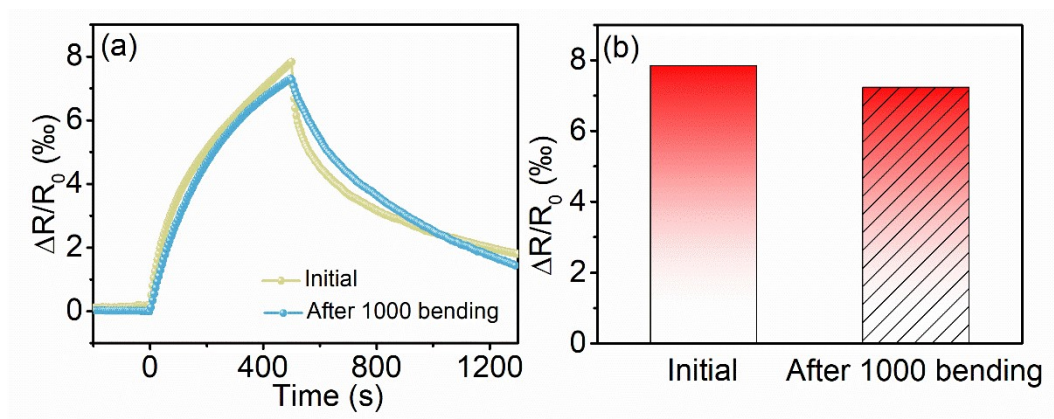

**Fig. S17.** The dynamic response curves of LIG/Au-0.1 M to 1.0 ppm 2-CEES at 80 °C before and after 1000 bending cycles with a curvature radii of 6 mm.

**Table S1.** Comparison of the 2-CEES sensing performances of LIG/Au-0.1 M with that in recent studies.

| Material                                                 | Temperature (°C) | Range of detection (ppm) | Response /recovery time (s) | 2-CEES concentration (ppm) | Sensitivity | LOD (ppb) | Selectivity | Heater          | Linear range (ppm) | Ref.      |
|----------------------------------------------------------|------------------|--------------------------|-----------------------------|----------------------------|-------------|-----------|-------------|-----------------|--------------------|-----------|
| Core-shell ZnFe <sub>2</sub> O <sub>4</sub> microspheres | 250              | 0.1~3.5                  | 18/546                      | 1                          | 9.07%       | <100      | YES         | External heater | --                 | 2         |
| Al-doped ZnO NPs                                         | 500              | 20                       | --                          | 20                         | 954.2       | --        | YES         | External heater | --                 | 3         |
| WO <sub>3</sub> /WS <sub>2</sub>                         | 240              | 0.1~11.4                 | 20/55                       | 5.7                        | 81%         | <100      | YES         | External heater | --                 | 4         |
| WO <sub>3</sub> /graphite                                | 260              | 0.1~11.4                 | 8/34                        | 5.7                        | 63%         | 100       | YES         | External heater | 0.1~1              | 5         |
| ZnO NPs                                                  | 250              | 0.4~20                   | --                          | 1                          | 15          | 400       | YES         | External heater | 0.4~1              | 6         |
| Ru-CdSnO <sub>3</sub>                                    | 350              | 4                        | 5/185                       | 4                          | 62.12       | --        | YES         | External heater | --                 | 7         |
| CdSnO <sub>3</sub>                                       | 350              | 4                        | 2/75                        | 4                          | 12.05       | --        | YES         |                 | --                 |           |
| Pt-CdSnO <sub>3</sub> thin film                          | 300              | 4                        | 8/125                       | 4                          | 58.63       | --        | YES         | External heater | --                 | 8         |
| SnO <sub>2</sub> -5.0 wt% Sm <sub>2</sub> O <sub>3</sub> | 200              | 0.1~10                   | --                          | 1                          | 81          | --        | YES         | External heater | --                 | 9         |
| LIG/Au-0.1 M                                             | 80               | 0.1~10                   | 400s/--                     | 1                          | 7.85%       | 5.8       | YES         | Self-heating    | 0.1~1              | This work |

## References

1. J. Lin, Z. W. Peng, Y. Y. Liu, F. Ruiz-Zepeda, R. Q. Ye, E. L. G. Samuel, M. J. Yacaman, B. I. Yakobson and J. M. Tour, *Nat. Commun.*, 2014, **5**, 5714..
2. J. Yang, L. Yang, S. Cao, J. Yang, C. Yan, L. Zhang, Q. Huang and J. Zhao, *Anal. Methods*, 2023, **15**, 3084-3091.
3. R. Yoo, D. Lee, S. Cho and W. Lee, *Sens. Actuators B Chem.*, 2018, **254**, 1242-1248.
4. Y. Fan, K. Li, X. Ren, W. Yan, C. Zhu, Y. Zhao, W. Zeng, Z. Chen and S. Wang, *J. Mater. Chem. C*, 2021, **9**, 17496-17503.
5. C. Qiu, K. Li, W. Yan, Y. Fan, C. Xia, C. Sun, W. Zeng and S. Wang, *Mater. Adv.*, 2022, **3**, 6862-6868.
6. R. Yoo, C. Oh, M. J. Song, S. Cho and W. Lee, *J. Nanosci.*, 2018, **18**, 1232-1236.
7. L. A. Patil, V. V. Deo, M. D. Shinde, A. R. Bari, D. M. Patil and M. P. Kaushik, *Sens. Actuators B Chem.*, 2014, **191**, 130-136.
8. L. A. Patil, V. V. Deo, M. D. Shinde, A. R. Bari and M. P. Kaushik, *Sens. Actuators B Chem.*, 2011, **160**, 234-243.
9. H. M. Aliha, A. A. Khodadadi and Y. Mortazavi, *Sens. Actuators B Chem.*, 2013, **181**, 637-643.
